# Supplementary material for: Decrease of circARID1A retards glioblastoma invasion by modulating miR-370-3p/ TGFBR2 pathway
Source: PubMed Central journal article supplement (PMC9379412; doi:10.7150/ijbs.66673), 2022-08-08
Supplement: ijbsv18p5123s1.pdf [file ijbsv18p5123s1.pdf]

| Transfections            |                                                  |
|--------------------------|--------------------------------------------------|
|                          | sequence                                         |
| Si-circARID1A-1          | TTGCCTCCATCCAGTCCAA                              |
| Si-circARID1A-2          | GCCTCCATCCAGTCCAATG                              |
| Hsa-miR-370-3p mimic     | GCCUGCUGGGGUGGAACCUUGU<br>ACCAGGUUCCACCCCAGCAGGC |
| Hsa-miR-370-3p inhibitor | ACCAGGUUCCACCCCAGCAGGC                           |
| Primers                  |                                                  |
| circARID1A-F-con         | CCCCTCATGCCCAACCTTCGT                            |
| circARID1A-R-con         | TGCCCTCCCTTACTGGAGGTCATTG                        |
| circARID1A-F-div         | AGATTCATTTGGGTCTCAGGC                            |
| circARID1A-R-div         | ATTGGACTGGATGGAGGCA                              |
| ARID1A-F                 | GGACCTCTATCGCCTCTATGTG                           |
| ARID1A-R                 | GGACTTCTTGGGAATCAGCAG                            |

## Dual-luciferase reporter plasmid of TGFBR 3'UTR

### Predicted binding sites:

|                                                     | Predicted consequential pairing of target region (top) and miRNA (bottom)                                                                              | Site type | Context++ score | Context++ score percentile | Weighted context++ score | Conserved branch length | P <sub>CT</sub> |
|-----------------------------------------------------|--------------------------------------------------------------------------------------------------------------------------------------------------------|-----------|-----------------|----------------------------|--------------------------|-------------------------|-----------------|
| Position 62-69 of TGFBR2 3' UTR<br>hsa-miR-370-3p   | 5' ...ACCAAAGAACAGAGGCAGCAGGA...<br>                                            <br>3'                                          UGSUCCAAGGUGGGGUCGUCCG | 8mer      | -0.03           | 58                         | -0.03                    | 4.245                   | N/A             |
| Position 154-160 of TGFBR2 3' UTR<br>hsa-miR-370-3p | 5' ...AAGCAGAAACAACAGCAGCAGGG...<br>                                            <br>3'                                          UGGUCCAAGGUGGGGUCGUCCG | 7mer-m8   | -0.05           | 67                         | -0.05                    | 3.365                   | N/A             |

### WT:

CTCTTCTGGGGCAGGCTGGGCCATGTCCAAAGAGGCTGCCCCCTTCACCA  
AAGAACAGAGGCAGCAGGAAGCTGCCCTGAACTGATGCTTCCTGGAAA  
ACCAAGGGGGTCACTCCCCTCCCTGTAAGCTGTGGGGATAAGCAGAAACA

ACAGCAGCAGGAGAGTGGGTGACATAGAGCATTCTATGCCTTTGACATTGT  
CATAGGATAAGCTGTGTTAGCACTTCCTCAGGAAATGAGATTGATTTTAC  
AATAGCCAATAACATTTGCACTTTATTAATGCCTGTATATAAATATGAAT

Mut:

CTCTTCTGGGGCAGGCTGGGCCATGTCCAAAGAGGCTGCCCCTCTCACCA  
AAGAACAGAGGagatgcagAGCTGCCCCTGAACTGATGCTTCCTGGAAAACC  
AAGGGGGTCACTCCCCTCCCTGTAAGCTGTGGGGATAAGCAGAAACAACA  
GttcagtGAGTGGGTGACATAGAGCATTCTATGCCTTTGACATTGTCATAGGA  
TAAGCTGTGTTAGCACTTCCTCAGGAAATGAGATTGATTTTACAATAGCC  
AATAACATTTGCACTTTATTAATGCCTGTATATAAATATGAAT

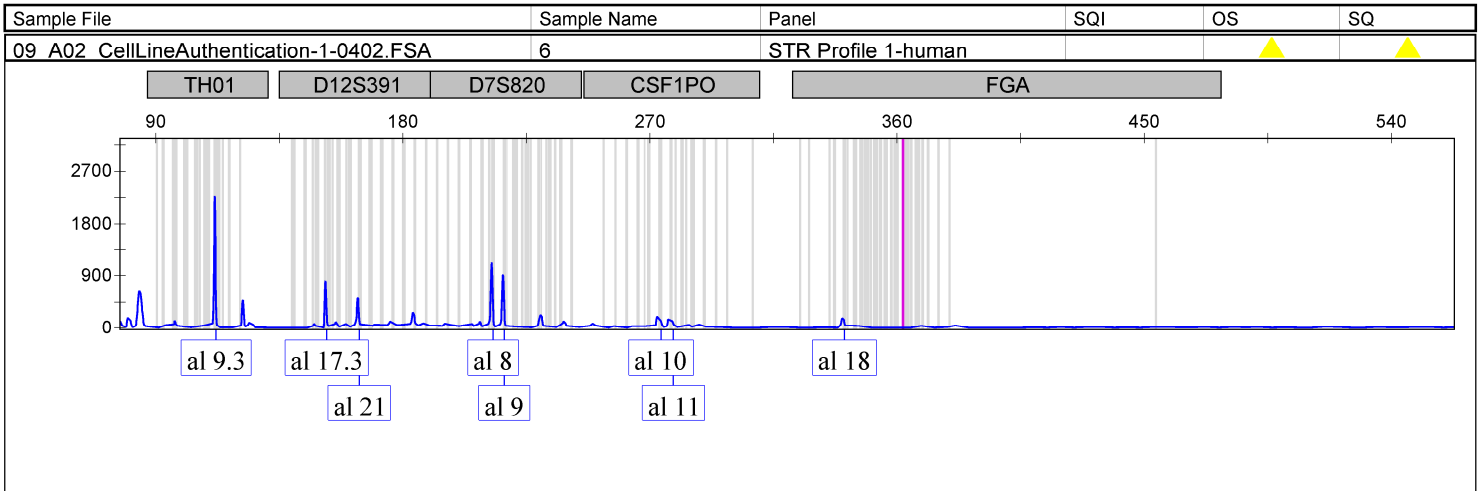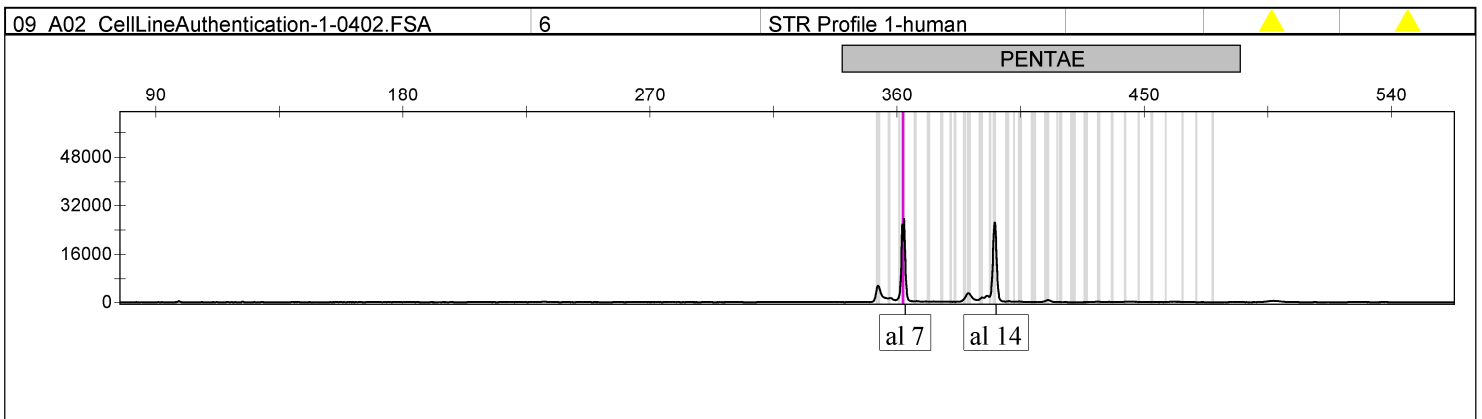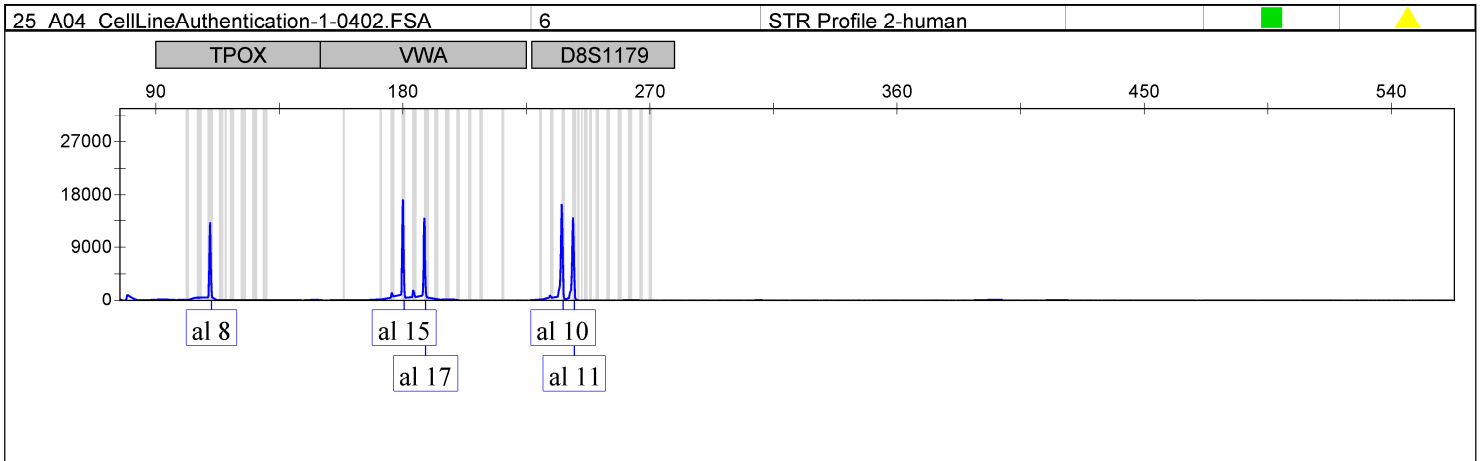

| Sample File                              | Sample Name | Panel               | SQI | OS | SQ |
|------------------------------------------|-------------|---------------------|-----|----|----|
| 25 A04 CellLineAuthentication-1-0402.FSA | 6           | STR Profile 2-human |     | ■  | ▲  |

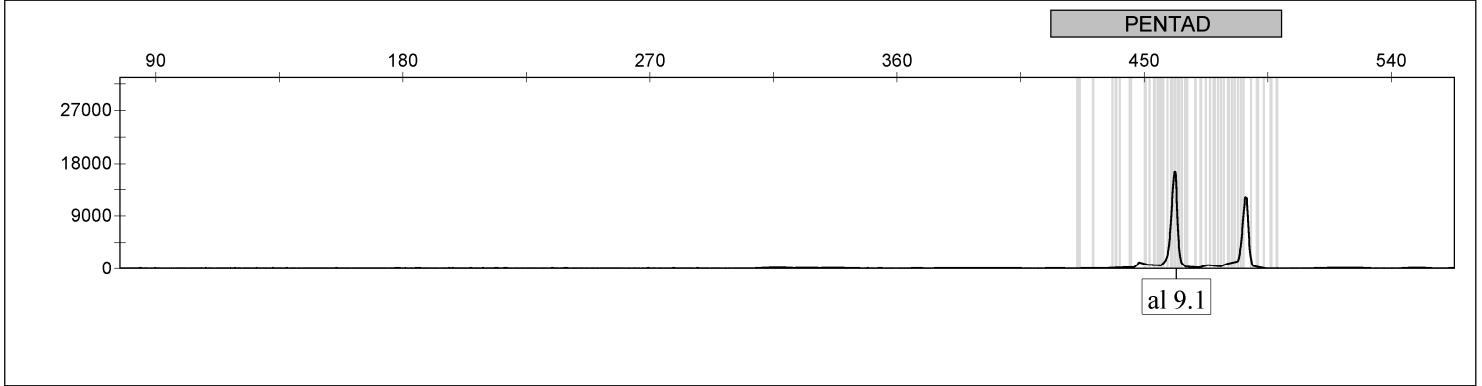

| Sample File                              | Sample Name | Panel               | SQI | OS | SQ |
|------------------------------------------|-------------|---------------------|-----|----|----|
| 41 A06 CellLineAuthentication-1-0402.FSA | 6           | STR Profile 3-human |     | ▲  | ▲  |

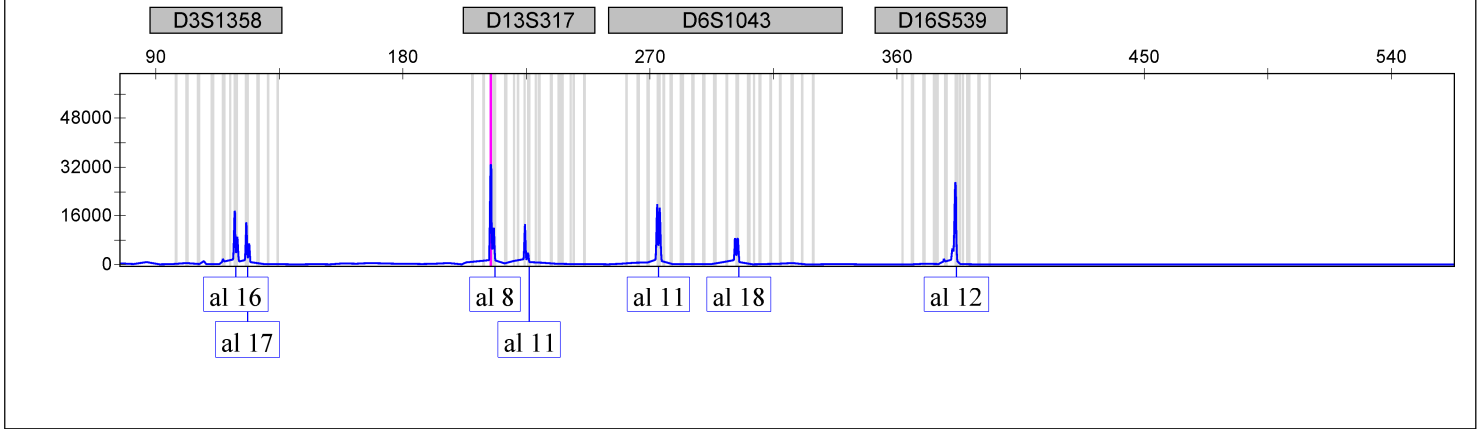

| Sample File                              | Sample Name | Panel               | SQI | OS | SQ |
|------------------------------------------|-------------|---------------------|-----|----|----|
| 41 A06 CellLineAuthentication-1-0402.FSA | 6           | STR Profile 3-human |     | ▲  | ▲  |

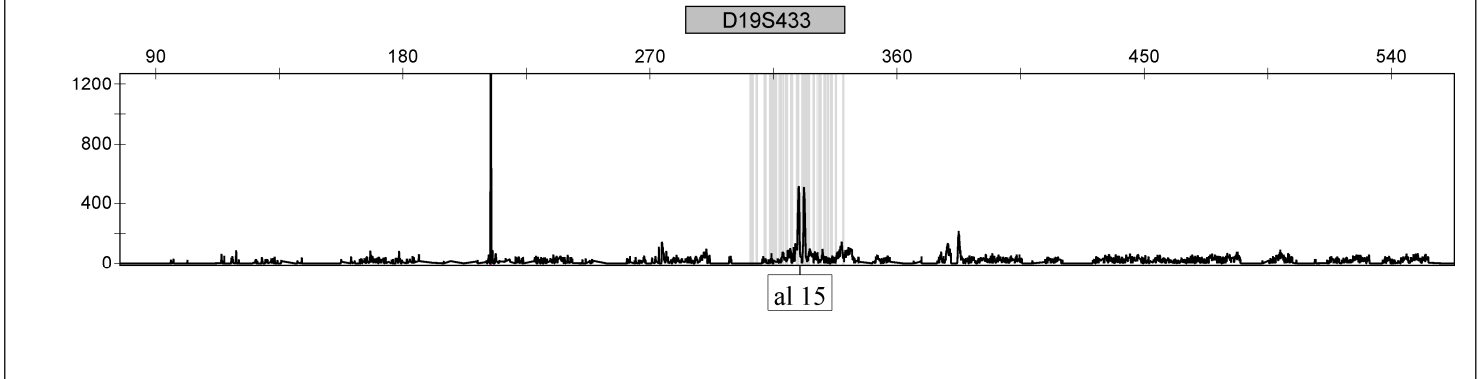

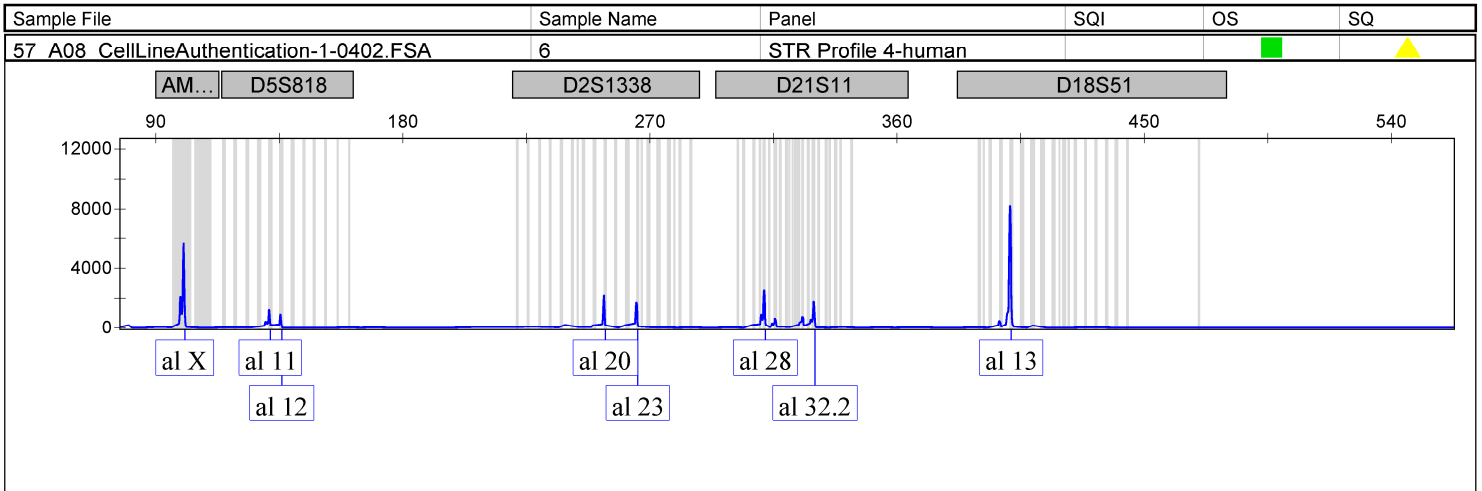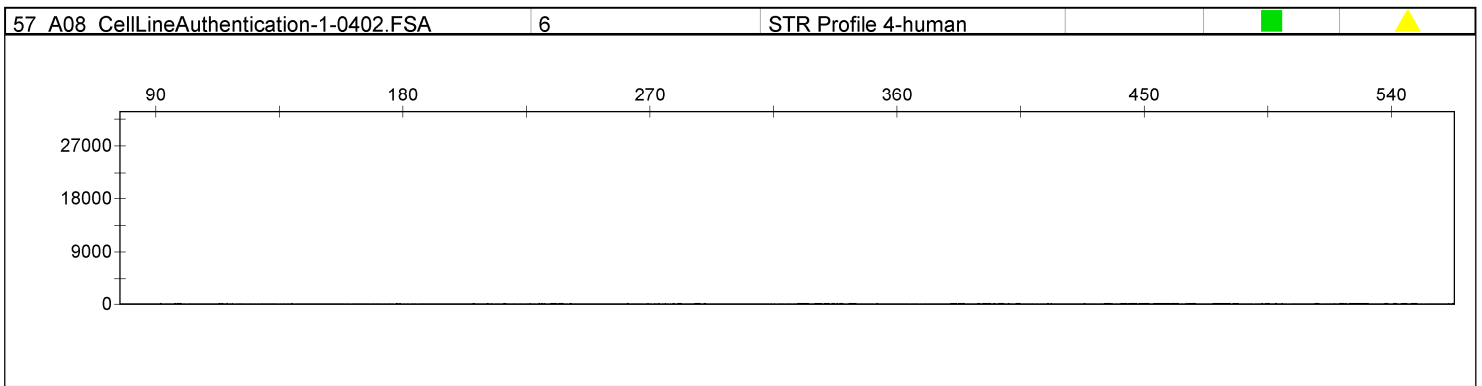

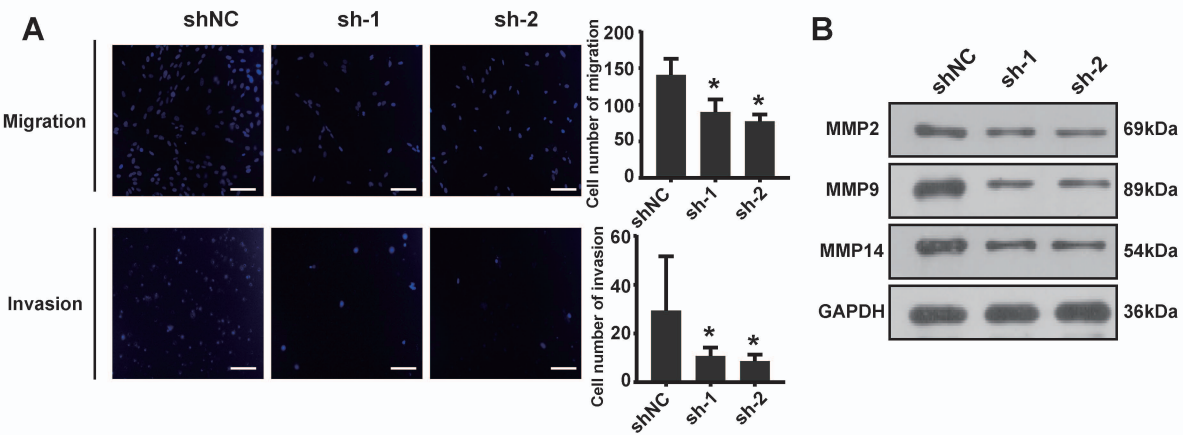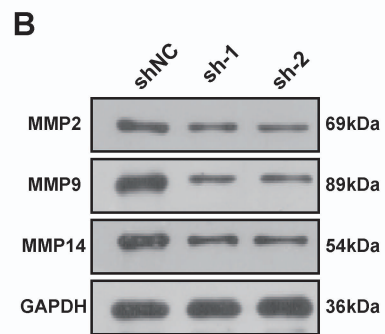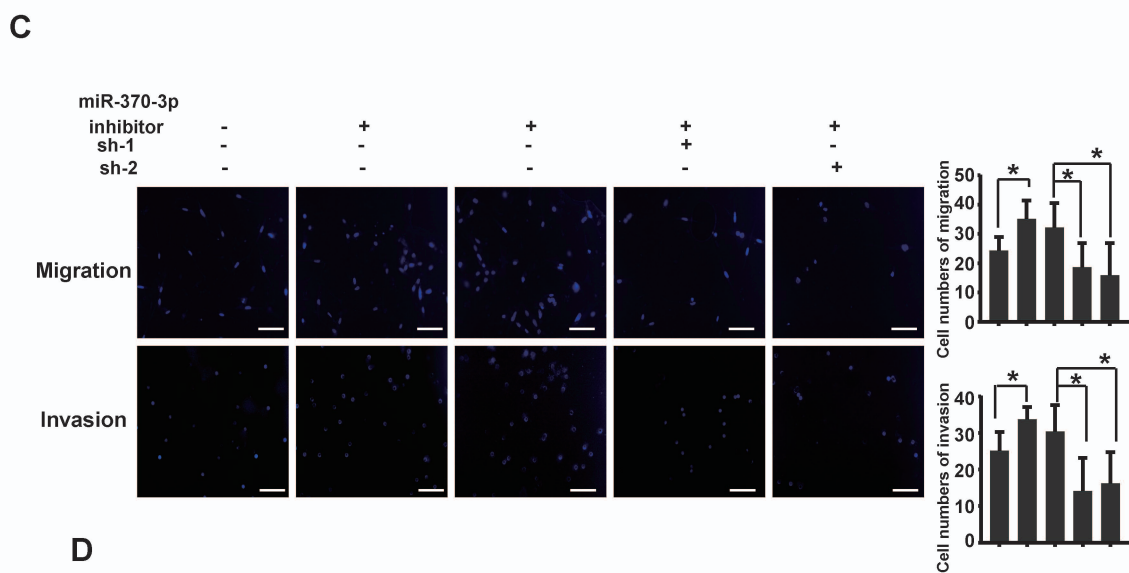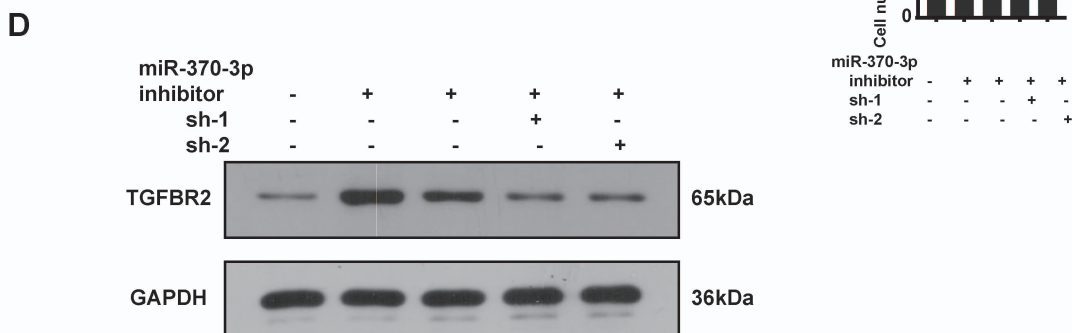

**Supplementary Figure 1. Decrease in circARID1A inhibited U118 cell migration and invasion via modulating miR-370-3p/TGFBR2 pathways.** **A.** Left: Images of Transwell assays of U118 cells, scale bar, 100 $\mu$ m; Right: Analyses of Transwell assay results indicated that decrease in circARID1A significantly inhibited U87 cell migration and invasion.  $n = 5, *p < 0.05$ , ANOVA. **B.** Images of western blotting showed that the expressions of MMPs decreased after silencing circARID1. **C.** Left: Images of Transwell assays of U118 cells; Right: Analyses of Transwell assays results indicated that transfections of miR-370-3p inhibitor promoted U118 cell migration and invasion, while silencing circARID1A suppressed the promotion. scale bar, 50 $\mu$ m  $n = 5, *p < 0.05$ , ANOVA. **D.** Images of western blotting showed that expression of TGFBR2 protein was decreased after silencing circARID1A.
